# Supplementary material
Source: publisher site journal article supplement (https://www.dovepress.com/article/255489)
Supplement: Supplementary file 1 [file get_supplementary_file.php]

**Supplementary Information**

**Tryptophol Coating Reduces Catheter-Related Cerebral and Pulmonary Infections by *Scedosporium apiospermum***

Thitinan Kitisin1, Watcharamat Muangkaew1, Sumate Ampawong2, Passanesh Sukphopetch1

1Department of Microbiology and Immunology, Faculty of Tropical Medicine, Mahidol University, Bangkok, Thailand

2Department of Tropical Pathology, Faculty of Tropical Medicine, Mahidol University, Bangkok, Thailand

Correspondence: Passanesh Sukphopetch

Department of Microbiology and Immunology, Faculty of Tropical Medicine, Mahidol University, 420/6 Rajavithi Road, Ratchathewi, Bangkok 10400, Thailand

Tel +66 2 354 9100

Fax +66 2 643 5583

Email natthanej.lup@mahidol.ac.th

**
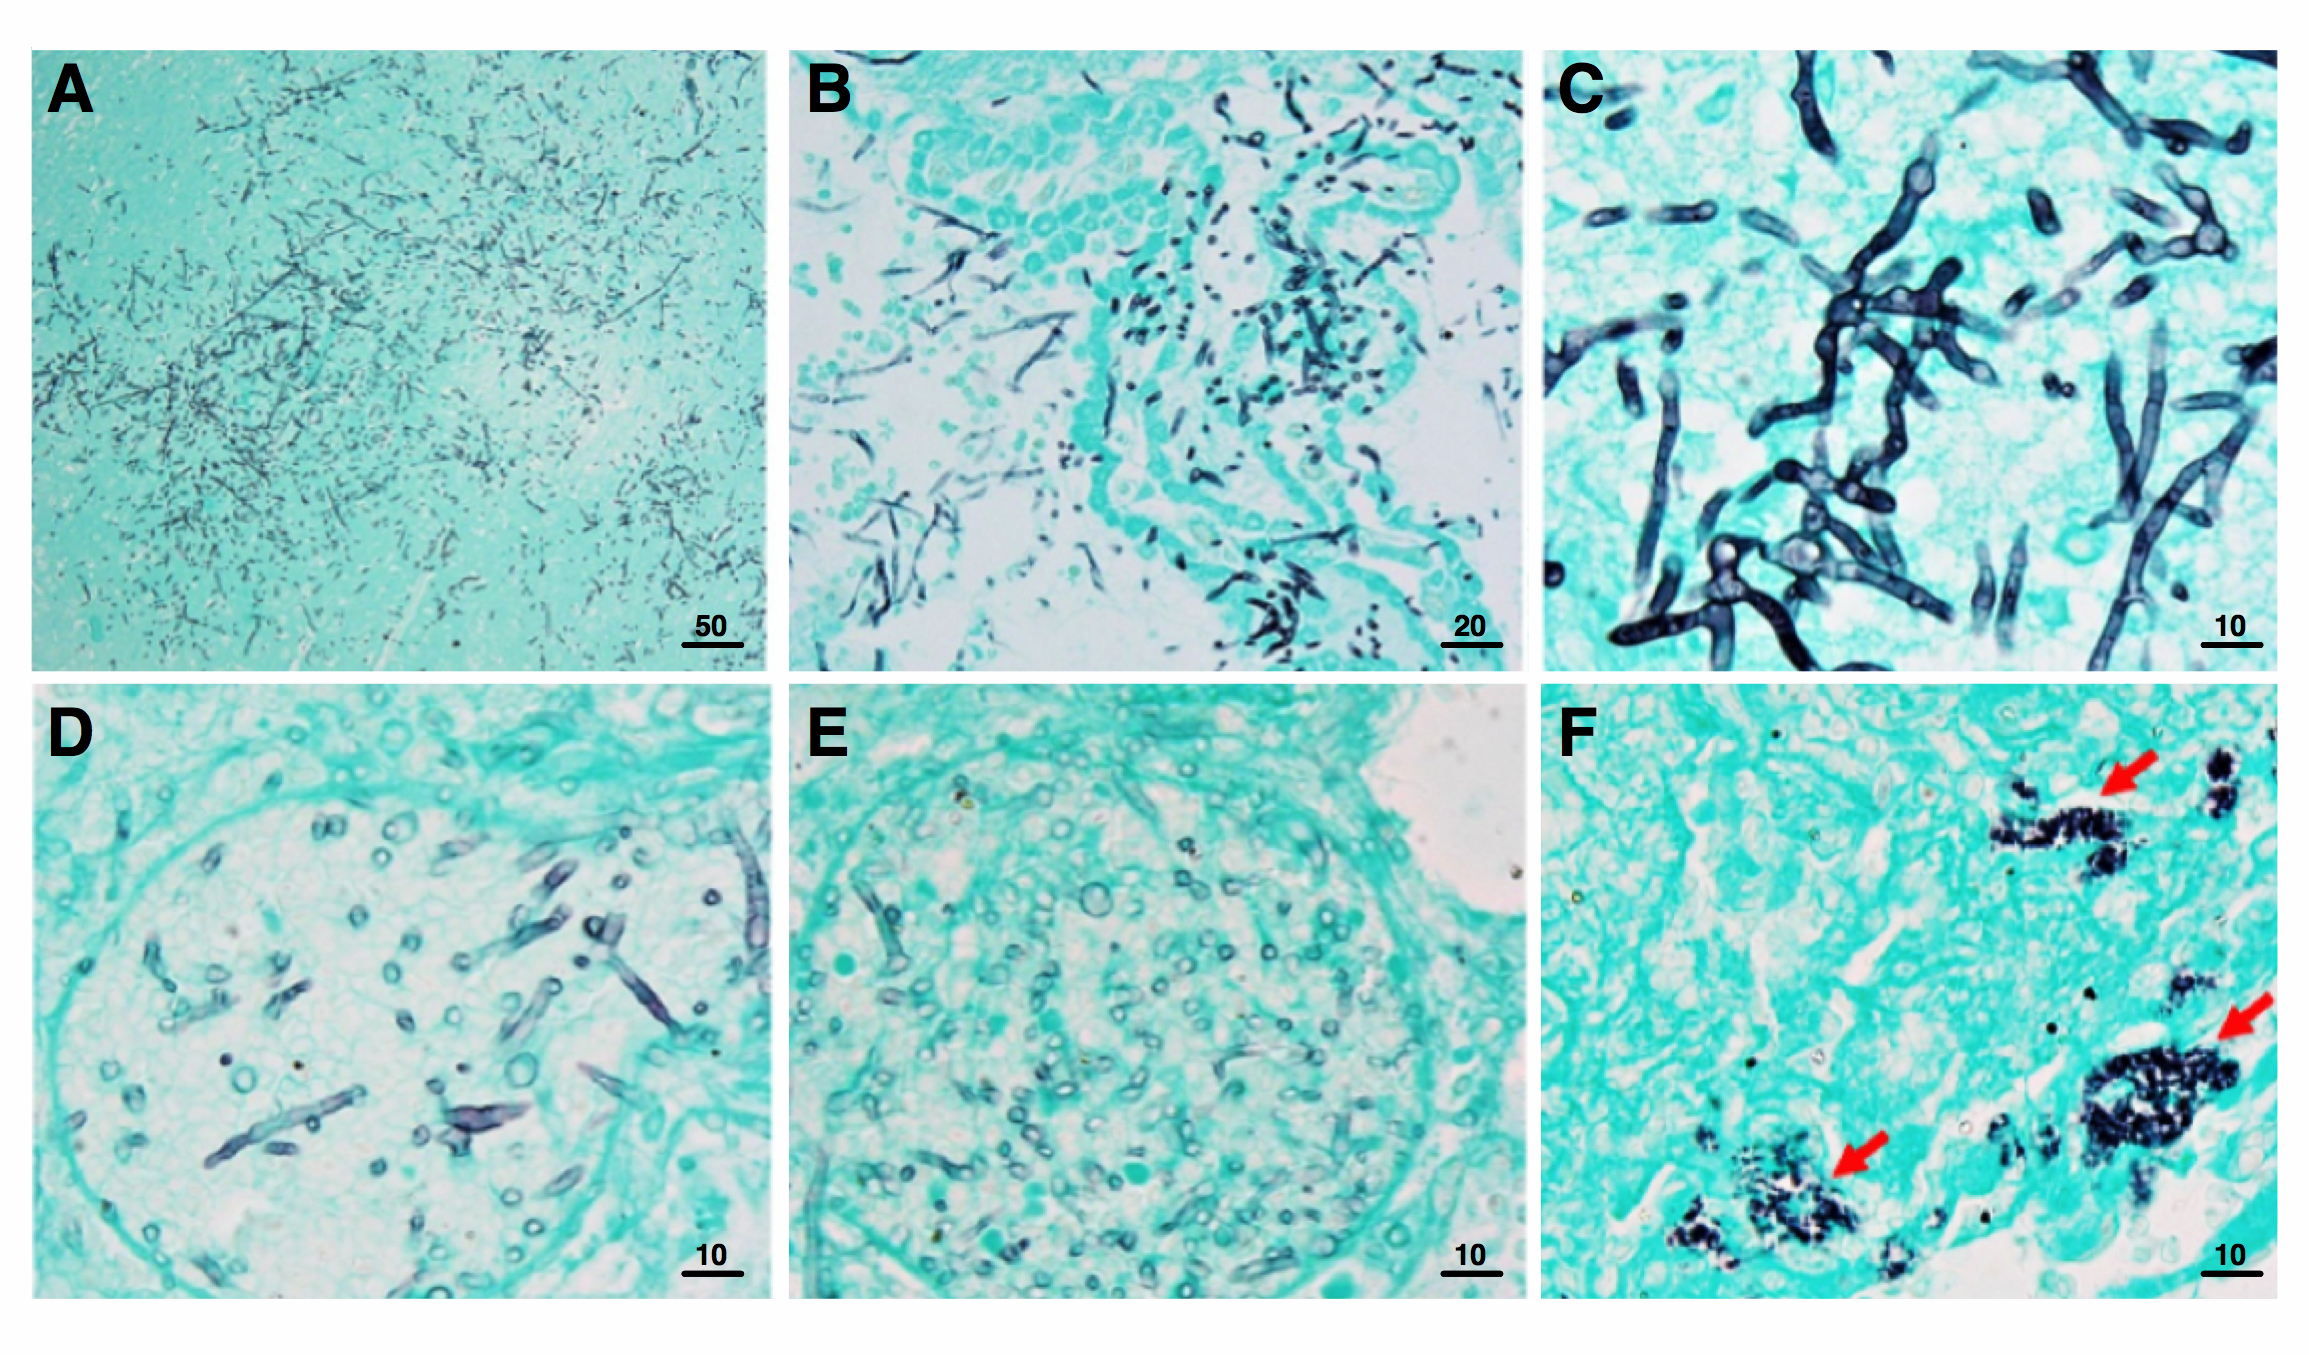
**

**Supplementary Figure 1** The presence of *S. apiospermum* hyphae in brains and lungs from uncoated catheter groups were determined using gomori methenamine silver (GMS) staining.*S. apiospermum* hyphae were shown in black as positive silver stain in (A, C) brain tissues, perivascular area of (B) brain and (D-E) lung, and (F) lung tissue. Scale bar = 50, 20, and 10 μm.
